# Supplementary material
Source: PubMed Central journal article supplement (PMC5555371)
Supplement: NIHMS889716-supplement.pdf [file NIHMS889716-supplement.pdf]

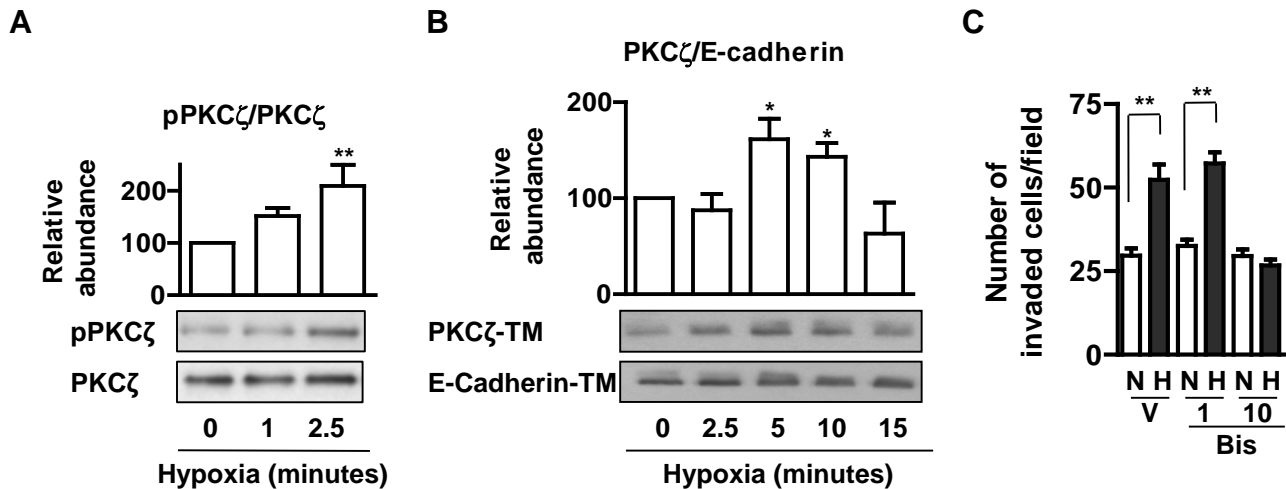

**Fig SF1.** Inhibition of activation of PKC $\zeta$  prevents hypoxia-induced invasion. (A-B) A549 cells were exposed to normoxia or hypoxia for the indicated time periods. The whole cell lysates (A) or the total membrane (TM) fractions (B) were prepared, and aliquots with the same amount of protein were subjected to SDS-PAGE followed by Western blot analysis for Thr-410-phosphorylated PKC $\zeta$  (pPKC $\zeta$ ), PKC $\zeta$ , and E-cadherin. The amount of pPKC $\zeta$  and PKC $\zeta$  were normalized to those of PKC $\zeta$  and E-cadherin, respectively. \*,  $p < 0.05$ ; \*\* and ##,  $p < 0.01$ . C) A549 cells were cultured on BD Matrigel invasion chambers, pretreated with Bisindolylmaleimide I (Bis) at the doses of 1 and 10  $\mu$ M, and exposed to normoxia (N) or hypoxia (H) for 48 hours for the measurement of invasion. Experiments were carried out in triplicates and repeated three times. The results were compared to that of A549 cells and data are expressed as mean  $\pm$  SEM. \*\*,  $p < 0.01$ .

## Supplemental Fig SF2

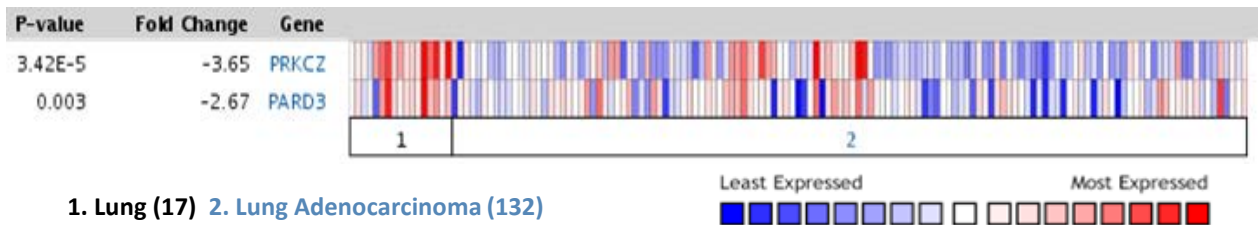

**Fig SF2.** Lung adenocarcinoma cells express reduced levels of PKC $\zeta$ /Pard3/Pard6. Comparison of Pard3 (gene name PARD3) and PKC $\zeta$  (gene name PRKCZ) mRNA expression in tissues of lung adenocarcinoma vs. Normal. The results were obtained using datasets published by Bhattacharjee et al. <sup>29</sup> and analysis tools provided by OncoPrint™ (Compendia Bioscience, Ann Arbor, MI).

**Supplemental table ST1: Suppression of Pard3 alters gene expression in lung adenocarcinoma cells.**

| GO Term                                                | Count | %       | Genes                                                                                                                                                                                                                                                |
|--------------------------------------------------------|-------|---------|------------------------------------------------------------------------------------------------------------------------------------------------------------------------------------------------------------------------------------------------------|
| GO:0009611~response to wounding                        | 35    | 9.85915 | F2RL2, CXCL1, PPARA, CCL2, CXCL3, CXCL2, C1R, BDKRB2, FOS, MAP3K1, PAX7, CFH, APOH, SERPINA3, MGLL, IL1B, CD24, CFI, IL1A, SCG2, FN1, NFKBIZ, IL8, CFB, NOX1, C4BPA, SOD2, PLSCR1, HNF4A, F5, AOX1, VCAN, IGFBP1, CD14, TM4SF4                       |
| GO:0006954~inflammatory response                       | 23    | 6.47887 | CXCL1, NFKBIZ, CCL2, IL8, CFB, CXCL3, CXCL2, NOX1, C1R, C4BPA, BDKRB2, FOS, AOX1, SERPINA3, CFH, MGLL, IL1B, CD24, CFI, CD14, IL1A, SCG2, FN1                                                                                                        |
| GO:0042127~regulation of cell proliferation            | 37    | 10.4225 | VIP, CXCL1, FGFR2, RARRES3, RBP4, RARRES1, CCL2, CXCL5, IGFBP7, MMP7, BDKRB2, VCAM1, MYOCD, APOE, TGM2, APOH, IL1B, KRT4, CD24, LTB, FGFBP1, IL1A, SCG2, CDC7, TXNIP, IL8, TBX2, NOX1, SOD2, SUZ12, NRAS, CD38, HNF4A, IL12A, MUC5AC, IGFBP3, TM4SF4 |
| GO:0006955~immune response                             | 34    | 9.57746 | PSMB10, CXCL1, IL1R2, IFIH1, CCL2, CXCL5, IFITM2, CXCL3, SUSD2, CXCL2, CD70, OAS1, IL32, C1R, CFH, IL1B, CD24, CFI, LTB, IL1A, FYB, EXO1, IL8, BST1, CFB, PRG4, C4BPA, PSMB8, HLA-F, TNFSF10, IL12A, GBP3, IFI6, CD14                                |
| GO:0008285~negative regulation of cell proliferation   | 22    | 6.19718 | CXCL1, RBP4, RARRES3, RARRES1, IL8, IGFBP7, BDKRB2, SOD2, HNF4A, APOE, IL12A, APOH, IL1B, MUC5AC, CD24, KRT4, IGFBP3, LTB, FGFBP1, TM4SF4, IL1A, SCG2                                                                                                |
| GO:0006952~defense response                            | 29    | 8.16901 | CXCL1, IFIH1, CCL2, CXCL3, CXCL2, IL32, C1R, BDKRB2, FOS, LGALS3BP, CFH, SERPINA3, IL1B, MGLL, CD24, CFI, MX1, IL1A, SCG2, FN1, NFKBIZ, IL8, CFB, NOX1, C4BPA, INHBB, AOX1, IL12A, CD14                                                              |
| GO:0006959~humoral immune response                     | 9     | 2.53521 | EXO1, PSMB10, CCL2, BST1, CFB, CFH, C1R, C4BPA, CFI                                                                                                                                                                                                  |
| GO:0042981~regulation of apoptosis                     | 32    | 9.01408 | IFIH1, CCL2, CD70, BDKRB2, AHRR, CASP4, APOE, MAP3K1, PAX7, TGM2, APOH, IL1B, CD24, MX1, LTB, IL1A, ANGPTL4, SCG2, TXNIP, SOCS2, WRN, IFI16, SOD2, CIDEA, CD38, NRAS, TNFSF10, IL12A, MUC5AC, IGFBP3, IFI6, CAMK1D                                   |
| GO:0043067~regulation of programmed cell death         | 32    | 9.01408 | IFIH1, CCL2, CD70, BDKRB2, AHRR, CASP4, APOE, MAP3K1, PAX7, TGM2, APOH, IL1B, CD24, MX1, LTB, IL1A, ANGPTL4, SCG2, TXNIP, SOCS2, WRN, IFI16, SOD2, CIDEA, CD38, NRAS, TNFSF10, IL12A, MUC5AC, IGFBP3, IFI6, CAMK1D                                   |
| GO:0010941~regulation of cell death                    | 32    | 9.01408 | IFIH1, CCL2, CD70, BDKRB2, AHRR, CASP4, APOE, MAP3K1, PAX7, TGM2, APOH, IL1B, CD24, MX1, LTB, IL1A, ANGPTL4, SCG2, TXNIP, SOCS2, WRN, IFI16, SOD2, CIDEA, CD38, NRAS, TNFSF10, IL12A, MUC5AC, IGFBP3, IFI6, CAMK1D                                   |
| GO:0002526~acute inflammatory response                 | 9     | 2.53521 | CFB, CFH, SERPINA3, IL1B, C1R, C4BPA, CFI, IL1A, FN1                                                                                                                                                                                                 |
| GO:0048584~positive regulation of response to stimulus | 14    | 3.94366 | POLR3G, IL8, CFB, C1R, C4BPA, NTRK3, ERCC8, IL12A, CFH, TGM2, IL1B, CD24, CFI, SCG2                                                                                                                                                                  |
| GO:0050900~leukocyte migration                         | 7     | 1.97183 | VCAM1, CCL2, IL8, CXCL3, IL1B, CD24, SCG2                                                                                                                                                                                                            |
| GO:0016477~cell migration                              | 15    | 4.22535 | CCL2, S100P, IL8, CXCL3, NOX1, TBX1, VCAM1, PRSS3, IL12A, IL1B, VCAN, CD24, CEACAM1, FN1, SCG2                                                                                                                                                       |
| GO:0009991~response to extracellular stimulus          | 13    | 3.66197 | RBP4, PPARA, CCL2, CFB, IGFBP7, ASL, SOD2, ASGR1, FOS, CD38, RPS19, MYOCD, IL1B                                                                                                                                                                      |
| GO:0042060~wound healing                               | 12    | 3.38028 | F2RL2, PLSCR1, PPARA, HNF4A, F5, MAP3K1, PAX7, APOH, IL1B, IGFBP1, TM4SF4, FN1                                                                                                                                                                       |
| GO:0051605~protein maturation by peptide bond cleavage | 8     | 2.25352 | CFB, PRSS3, CFH, APOH, C1R, C4BPA, CFI, PCSK5                                                                                                                                                                                                        |
| GO:0009725~response to hormone stimulus                | 17    | 4.78873 | TXNIP, PPARA, RBP4, CCL2, SOCS2, IGFBP7, TIMP4, NPY1R, NR4A3, ASL, CD38, PRKAR2B, FOS, KRT19, IL1B, CD24, IGFBP1                                                                                                                                     |
| GO:0009628~response to abiotic stimulus                | 17    | 4.78873 | TXNIP, RBP4, CCL2, IGFBP7, NOX1, WRN, BDKRB2, GPR98, SOD2, FOS, NRAS, ERCC8, DIO2, MAP3K1, IL12A, IL1B, LTB                                                                                                                                          |
| GO:0031099~regeneration                                | 7     | 1.97183 | CCL2, PAX7, APOH, VCAN, NR4A3, IGFBP1, TM4SF4                                                                                                                                                                                                        |
| GO:0048870~cell motility                               | 15    | 4.22535 | CCL2, S100P, IL8, CXCL3, NOX1, TBX1, VCAM1, PRSS3, IL12A, IL1B, VCAN, CD24, CEACAM1, FN1, SCG2                                                                                                                                                       |
| GO:0051674~localization of cell                        | 15    | 4.22535 | CCL2, S100P, IL8, CXCL3, NOX1, TBX1, VCAM1, PRSS3, IL12A, IL1B, VCAN, CD24, CEACAM1, FN1, SCG2                                                                                                                                                       |
| GO:0030593~neutrophil chemotaxis                       | 4     | 1.12676 | CCL2, IL8, CXCL3, IL1B                                                                                                                                                                                                                               |

## Supplemental Table ST2. Primer sequences for qRT-PCR

| Gene    | Forward 5' to 3'         | Reverse 5' to 3'            | Application |
|---------|--------------------------|-----------------------------|-------------|
| AHRR    | CTGCCTCTTGGTACATCACGTAAT | CGTTGTGTGTTTCTCTGTACTIONCCA | qRT-PCR     |
| APOE    | GCGTTGCTGGTCACATTCTCT    | TCTGTCTCCACCGCTTGCT         | qRT-PCR     |
| CASP4   | CACACGCCTGGCTCTCATC      | CCATTCTCGGAGGCAGAT          | qRT-PCR     |
| CEACAM1 | TGGCCCTGGTTGCTCTGA       | CGGTCTTCCCAGAAATGCA         | qRT-PCR     |
| CEACAM6 | CCAGGGCCCCGCATACA        | ATCAGCAGGGATGCATTGG         | qRT-PCR     |
| CEACAM7 | CAGGGCCCCGCACACAA        | CTGGATCAGCAGGGTTCCA         | qRT-PCR     |
| CCL2    | CGCCTCCAGCATGAAAGTCT     | GGAATGAAGGTGGCTGCTATG       | qRT-PCR     |
| CXCL1   | CCACTGCGCCCAAACC         | GCAAGCTTTCCGCCATT           | qRT-PCR     |
| CXCL2   | AAGGAGGCCCTGCCCTTA       | GTGGCCTCTGCAGCTGTGT         | qRT-PCR     |
| CXCL3   | GCATCCCCATGGTTTACAG      | TCAGTTGGTGTCTCCCTTGT        | qRT-PCR     |
| CXCL5   | TCCCCTACTCACAGCTTTGG     | TCGTCTTCTGCAATCTCTAACC      | qRT-PCR     |
| FGFR2   | TGCACAAGCTGACCAAACGT     | CTGGACTCAGCCGAAACTGTT       | qRT-PCR     |
| FN1     | CCTTCATGGCAGCGGTTT       | AGCGTCCTAAAGACTCCATGATCT    | qRT-PCR     |
| IFIH1   | TGGTCGAGCCAGAGCTGAT      | ACTCTGAACCACTGTGAGCAA       | qRT-PCR     |
| IGFBP1  | GGGACGCCATCAGTACCTATG    | TTTTTTGATGTTGGTGACATGGA     | qRT-PCR     |
| IGFBP7  | TCACTGGTGCCAGGTGTAC      | TGAGGACAGGTGTCGGGATT        | qRT-PCR     |
| IL8     | GGCAGAGCTGTGCCTGTTG      | TGGCAAACTGCACCTGTTG         | qRT-PCR     |
| IL1B    | TCAGCCAATCTTCATTGCTCAA   | TGGCGAGCTCAGGTACTTCTG       | qRT-PCR     |
| IL12A   | CCTTCACTCCCAAAACCT       | TGTCTGGCCTTCTGGAGCAT        | qRT-PCR     |
| MAP3K1  | CAAACCGCCGTGTTAACAAA     | GGCCCTATCTGCTGCAGTAAGT      | qRT-PCR     |
| MMP7    | GCTGGCTCATGCCTTTGC       | TCCTCATCGAAGTGAGCATCTC      | qRT-PCR     |
| NOX1    | TTGCAGCCGCACACTGA        | GGCCACCAGCTTGTGGAA          | qRT-PCR     |
| PAX7    | GAGGACGACGGCGAAAAGA      | CCCTTTGTCGCCAGGAT           | qRT-PCR     |
| PPARA   | AACATCCAAGAGATTTGCAATC   | CCGTAAAGCCAAAGCTTCCA        | qRT-PCR     |
| S100P   | CAGCCATGGGCATGATCA       | CCCTCGCTGCCCGAATAT          | qRT-PCR     |
| SFRP5   | CCCTACTGGAGGGTGTTCAC     | TCCGTGCCCATCCCTTAG          | qRT-PCR     |
| SOD2    | CGCGGCCTACGTGAACA        | CCAACGCCTCTGGTACTTC         | qRT-PCR     |
| TM4SF4  | CAAGGACTCTCTGGCCAAAAA    | GCTCTCACTGCCTCTTCA          | qRT-PCR     |
| VCAM1   | CACTCCGCGGTATCTGCAT      | TGTGCCTGGGAGGGTATTCA        | qRT-PCR     |
| VCAN    | GCAACAGCCGAGAACATTAGG    | GGGCTGGCCGAAAGATCTT         | qRT-PCR     |
